# Supplementary material
Source: ML conference proceedings conference paper supplement (https://openreview.net/forum?id=GxdPhNOYKf)
Supplement: supplementary_material [file attachment]

---

# Kernel-Based Function Approximation for Average Reward Reinforcement Learning: An Optimist No-Regret Algorithm

---

Anonymous Author(s)

Affiliation

Address

email

## Abstract

1       Reinforcement learning utilizing kernel ridge regression to predict the expected  
2       value function represents a powerful method with great representational capac-  
3       ity. This setting is a highly versatile framework amenable to analytical results.  
4       We consider kernel-based function approximation for RL in the infinite horizon  
5       average reward setting, also referred to as the undiscounted setting. We propose  
6       an *optimistic* algorithm, similar to acquisition function based algorithms in the  
7       special case of bandits. We establish novel *no-regret* performance guarantees for  
8       our algorithm, under kernel-based modelling assumptions. Additionally, we derive  
9       a novel confidence interval for the kernel-based prediction of the expected value  
10      function, applicable across various RL problems.

## 11   1 Introduction

12   Reinforcement learning (RL) has demonstrated substantial practical success across a variety of  
13   application domains, including gaming [1, 2, 3], autonomous driving [4], microchip design [5], robot  
14   control [6], and algorithmic search [7]. This empirical success has prompted deeper investigations  
15   into the analytical understanding of RL, especially in complex environments. Over the past decade,  
16   significant advances have been made in establishing theoretically grounded algorithms for various  
17   settings. In this work, we focus on the infinite horizon average reward setting, also known as the  
18   undiscounted setting [8, 9]. The infinite horizon setting is particularly well-suited for applications  
19   that involve continuing operations not divided into episodes such as load balancing and stock market  
20   operations. In contrast to the episodic setting [10] and the discounted setting [11], theoretical under-  
21   standing of RL algorithms is relatively limited for the average reward setting. For the infinite horizon  
22   setting, we develop a computationally efficient algorithm and establish its theoretical performance  
23   guarantees.

24   There is a natural progression in the complexity of RL models corresponding to the structural  
25   complexity of the Markov Decision Process (MDP). This progression ranges from tabular models to  
26   linear, kernel-based, and deep learning-based models. The kernel-based structure is an extension of  
27   linear structure to an infinite-dimensional linear model in the feature space of a positive definite kernel,  
28   resulting in a highly versatile model with great representational capacity for nonlinear functions. In  
29   addition, the closed-form expressions for the prediction and the uncertainty estimate in kernel-based  
30   models allow the development of algorithms based on nonlinear function approximation that are  
31   amenable to theoretical analysis. Kernel-based models also serve as an intermediate step towards  
32   understanding the deep learning-based models [see, e.g., 12] based on the Neural Tangent (NT) kernel  
33   approach [13].

The infinite-horizon average-reward setting has been extensively explored under the tabular structure [14, 8, 15]. Under the performance measure of *regret*, defined as the difference in the total reward achieved by a learning algorithm over  $T$  steps and that of the optimal stationary policy, performance bounds of  $\mathcal{O}(\text{poly}(|\mathcal{S}|, |\mathcal{A}|)\sqrt{T})$  have been established [see, e.g., 16], where  $\mathcal{S}$  and  $\mathcal{A}$  represent the state and action spaces, respectively, and the regret grows polynomial with their sizes. It is assumed for these results that the MDP is weakly communicating, a condition necessary for achieving sublinear regret [17]. Averaged over  $T$  steps, the regret diminishes as  $T$  increases, thereby offering what is known as a *no-regret* performance guarantee. The applicability of the tabular setting is limited, as many real-world problems feature very large or potentially infinite state-action spaces. Consequently, recent literature has explored the use of function approximation in RL, particularly through linear models [18, 19, 20, 9]. This approach represents the value function or the transition model via a linear transformation applied to a predefined feature mapping. In the linear setting, regret bounds of  $\mathcal{O}((dT)^{\frac{3}{4}})$  have been established [9], where  $d$  represents the ambient dimension of the linear feature map. Kernel-based models can be considered as linear models in the feature space of the kernel. That, however, is often infinite dimensional ( $d = \infty$ ). As such, the results with linear models do not translate to the kernel-based settings, necessitating novel analytical techniques. Also, for a discussion on further limitations of the linear models, see [21].

In this work, we propose the first RL algorithm in the infinite horizon average reward setting with non-linear function approximation using kernel-ridge regression. This is one of the most flexible models that lends well to theoretical analysis. Our algorithm, referred to as Kernel-based Upper Confidence Bound (KUCB-RL), utilizes kernel ridge regression to build predictor and uncertainty estimates for the expected value function. Inspired by the principle of optimism in the face of uncertainty and equipped with these statistics, KUCB-RL builds an upper confidence bound on the state-action value function over a future window of  $w$  steps. This bound serves as a proxy  $q_t$ , at each step  $t$ , for the state-action value function over this future window. At each step  $t$  with the current state  $s_t$ , the action is selected greedily with respect to this proxy:  $a_t = \arg \max_{a \in \mathcal{A}} q_t(s_t, a)$ . This approach resembles the acquisition function based algorithms such as GP-UCB and GP-TS, using Upper Confidence Bound and Thompson sampling, respectively, in the context of kernel-based bandits, also known as Bayesian optimization [22, 23]. Kernel-based bandit setting corresponds to the degenerate case of  $|\mathcal{S}| = 1$ . In comparison, in the RL setting, the action is selected based on the current state, and the reward depends on both the state and the action. A kernel-based model is used to provide predictions for the expected value function, which varies due to the Markovian nature of the temporal dynamics. This makes the RL problem significantly more challenging than the bandit problem where the predictions are derived for a fixed reward function. To address this latter challenge, we derive a novel kernel-based confidence interval that is applicable across RL problems.

## 1.1 Contributions

To summarize, our contributions are as follows. We develop a kernel based optimistic algorithm for the infinite horizon average reward setting, referred to as KUCB-RL. We establish no-regret guarantees for the proposed learning algorithm, which is the first for this setting to the best of our knowledge. Specifically, in Theorem 2, we prove a regret bound of  $\mathcal{O}\left(\frac{T}{w} + \left(w + \frac{w}{\sqrt{\rho}}\sqrt{\gamma(T; \rho) + \log(\frac{T}{\delta})}\right)\sqrt{\rho T \gamma(T; \rho) + \rho^2 w^2 \gamma(T; \rho) \gamma(T/w; \rho)}\right)$ , at a  $1 - \delta$  confidence level, where  $\rho$  is the parameter of kernel ridge regression and  $\gamma(T; \rho)$  is the maximum information gain, a kernel specific complexity term (see Section 2). This regret bound translates to  $\mathcal{O}\left(d^{\frac{1}{2}} T^{\frac{3}{4}}\right)$  in the special case of a linear model, recovering the best existing results [9] in dependence on  $T$  and improving by a factor of  $d^{\frac{1}{4}}$ . When applied to very smooth kernels with exponential eigendecay such as the Squared Exponential (SE) kernel, we obtain a regret of  $\tilde{\mathcal{O}}(T^{\frac{3}{4}})$ , with the notation  $\tilde{\mathcal{O}}$  hiding logarithmic factors. For one of the most general cases, the kernels with polynomial eigendecay with parameter  $p > 1$  (See Definition 1), that includes, for example, the Matérn family and NT kernels, we show that our regret bound translates to  $\tilde{\mathcal{O}}(T^{\frac{3p+5}{4p+4}})$ , which constitutes a no-regret guarantee. To highlight the significance of this result, we point out that no-regret guarantees for GP-UCB in the degenerate case of bandits were established only recently in [24], while the initial studies of GP-UCB (as well as GP-TS) [22, 23] did not provide no-regret guarantees for the case of polynomial eigendecay. As part of our analysis, in Theorem 1, we develop a novel confidence interval applicable across kernel-based RL problems that contributes to the eventual improved results.

## 1.2 Related Work

The vast RL literature can be categorized across various dimensions. In addition to the average reward, episodic, and discounted settings, as well as tabular, linear, and kernel-based structures mentioned above, other notable distinctions among settings include model-based versus model-free approaches, and offline versus online versus settings where the existence of a generative model is assumed (allowing the learning algorithm to sample the state-action of its choice at each step, rather than following the Markovian trajectory). Covering the entire breadth of RL literature is challenging. Here, we will focus on highlighting and providing comparisons with the most closely related works, particularly in terms of their setting and structure.

The kernel-based MDP structure has been considered in several recent works under the episodic setting [12, 25, 26, 27]. The regret bound proven in [12] for the episodic setting applies only to very smooth kernels such as SE kernel. [25] addressed this limitation by extending the results to Matérn and NT families of the kernels, albeit with a sophisticated algorithm that actively partitions the state-action domain into possibly many subdomains, using only the observations within each subdomain to obtain kernel-based prediction and uncertainty estimates. Their work is also based on a particular assumption that relates the kernel eigenvalues to the size of the domain. The work of [26] is most closely related to ours in terms of kernel-related assumptions. Specifically, our Assumption 4 is identical to Assumption 1 of [26]. They establish a regret bound of  $\mathcal{O}(H\gamma(N; \rho)\sqrt{N})$  for the episodic MDP setting, where  $N$  is the number of episodes,  $\gamma(N; \rho)$  is the maximum information gain, a kernel-related complexity term,  $H$  is the episode length and the value of  $\rho$  is a fixed constant close to 1. However, their regret bounds do not apply to general families of kernels, such as those with polynomially decaying eigenvalues (see Section 2.2 for the definition) including Matérn and NT kernels, as for this family of kernels  $\gamma(N; \rho)$  possibly grows faster than  $\sqrt{N}$ . As a result, a no-regret guarantee cannot be established in many cases of interest. In comparison, the infinite horizon setting considered in this work is more challenging than the episodic setting as evident when comparing these settings with linear modeling. For this more challenging setting, we establish no-regret guarantees. A key element of our improved results is the novel confidence interval we utilize in our analysis (Theorem 1). This result is general and can be used across RL problems, for example, improving the results of [26] as well.

In the tabular case, a lower bound of  $\Omega(\sqrt{D|S||A|T})$  on regret was established in [14] in the infinite-horizon average-reward setting, where  $D$  is the diameter of the MDP. For ergodic MDPs, [8] shows a regret bound of  $\tilde{\mathcal{O}}(\sqrt{t_{\text{mix}}^3|S||A|T})$ , where  $t_{\text{mix}}$  is the mixing time of an ergodic MDP. Furthermore, under the broader assumption of weakly communicating MDPs, which is necessary for low regret [28], the best existing regret bound of model-free algorithms is  $\tilde{\mathcal{O}}(|S|^5|A|^2\sqrt{T})$ , achieved by the recent work of [15]. Several works have studied linear function approximation in the infinite horizon average reward setting under strong assumptions of uniformly mixing and uniformly excited feature conditions [18, 19, 20]. Notably, [20] achieved a regret bound of  $\tilde{\mathcal{O}}\left(\frac{1}{\sigma}\sqrt{t_{\text{mix}}^3T}\right)$  under the linear bias function assumption, where  $\sigma$  is the smallest eigenvalue of policy-weighted covariance matrix. Under the much less restrictive setting of Bellman optimality equation assumption (Assumption 1) for linear MDP, [9] provides an algorithm with regret guarantee of  $\tilde{\mathcal{O}}((dT)^{3/4})$ . We also consider our kernel-based approach under this general assumption on MDP. Furthermore, for examples of infeasible algorithms in the literature, see [9], Algorithm 1. There also exists a separate model-based approach to the problem where the transition probability distribution (model) is learned and used for planning, usually requiring high memory and computational complexity and utilizing substantially different techniques and assumptions. While this approach is studied under tabular settings [17, 14] and linear settings [29], it is not clear whether model-based approaches can be feasibly constructed in the kernel-based setting, due to the space complexity of a kernel-based model.

Our work is also related to the simpler problem of kernelized bandits [22, 23, 30, 31]. Our construction of the confidence interval for the RL setting has been inspired the previous works on bandits, utilizing novel analysis introduced in [24]. Bandit settings can be considered a degenerate case of the RL framework with  $|S| = 1$ . In comparison, the temporal dependencies of MDP introduce substantial challenges, and the confidence intervals used in the bandit setting cannot be directly applied.

We summarize the most closely related work with a focus on model-free feasible algorithms in Table 1. We present the existing regret bounds for feasible algorithms under various assumptions on MDP and its structure (tabular, linear, kernel-based). The assumptions include weakly communicating

MDP [See 32, Section 8.3.1], Bellman optimality equation (our Assumption 1), and uniform mixing assumption [see 9, Assumption 3]. For a formal definition of linear MDP, see [9], Assumption 2, and for the linear bias function case, see [9], Assumption 4.

Table 1: Summary of the existing regret bounds in the infinite horizon average reward setting under various cases with respect to MDP structure (tabular, linear, kernel based) and assumptions.

| Algorithm             | Regret                                                       | MDP Assumption         | Structure         |
|-----------------------|--------------------------------------------------------------|------------------------|-------------------|
| UCB-AVG [15]          | $\tilde{O}( \mathcal{S} ^5  \mathcal{A} ^2 \sqrt{T})$        | Weakly Communicating   | Tabular           |
| OLSVI.FH [9]          | $\tilde{O}((dT)^{3/4})$                                      | Bellman Optimality Eq. | Linear            |
| MDP-Exp2 [9]          | $\tilde{O}(\sqrt{t_{\max}^3  \mathcal{S}   \mathcal{A}  T})$ | Uniform Mixing         | Linear Bias Func. |
| KUCB-RL (Algorithm 1) | $\mathcal{O}\left(T^{\frac{3p+5}{4p+4}}\right)$              | Bellman Optimality Eq. | Kernel-based      |

## 2 Problem Formulation

In this section, we overview the background on infinite horizon average reward (undiscounted) MDPs and kernel based modelling.

### 2.1 Infinite Horizon Average Reward MDP

An undiscounted MDP is described by the tuple  $(\mathcal{S}, \mathcal{A}, r, P)$  where  $\mathcal{S}$  is a state space with a possibly infinite number of elements,  $\mathcal{A}$  is a finite action set,  $r : \mathcal{S} \times \mathcal{A} \rightarrow [0, 1]$  is the reward function, and  $P(\cdot | s, a)$  is the unknown transition probability distribution over  $\mathcal{S}$  of the next state when action  $a$  is selected at state  $s$ . Throughout the paper we use the notation  $z = (s, a)$  for the state-action pairs, and  $\mathcal{Z} = \mathcal{S} \times \mathcal{A}$ .

The learner interacts with the MDP through  $T$  steps, starting from an arbitrary initial state  $s_1 \in \mathcal{S}$ . At each step  $t$ , the learner observes state  $s_t$  and takes an action  $a_t$  resulting in a reward  $r(s_t, a_t)$ . The next state  $s_{t+1}$  is revealed as a sample drawn from the transition probability distribution:  $s_{t+1} \sim P(\cdot | s_t, a_t)$ .

The goal of the learner is to compete against any fixed stationary policy. A stationary policy  $\pi : \mathcal{S} \rightarrow \mathcal{A}$  is a possibly random mapping from the states to actions. The long-term average reward of a stationary policy  $\pi$ , starting from state  $s \in \mathcal{S}$ , is defined as:

$$J^\pi(s) = \liminf_{T \rightarrow \infty} \frac{1}{T} \mathbb{E} \left[ \sum_{t=1}^T r(s_t, a_t) \mid s_1 = s, \forall t \geq 1, a_t = \pi(s_t), s_{t+1} \sim P(\cdot | s_t, a_t) \right].$$

We assume that the MDP belongs to the broad class of MDPs where the following form of Bellman optimality equation holds:

**Assumption 1 (Bellman optimality equation)** *There exists  $J^* \in \mathbb{R}$  and bounded measurable functions  $v^* : \mathcal{S} \rightarrow \mathbb{R}$  and  $q^* : \mathcal{S} \times \mathcal{A} \rightarrow \mathbb{R}$  such that the following conditions are satisfied for all states  $s \in \mathcal{S}$  and actions  $a \in \mathcal{A}$ :*

$$J^* + q^*(s, a) = r(s, a) + \mathbb{E}_{s' \sim P(\cdot | s, a)} [v^*(s')], \quad v^*(s) = \max_{a \in \mathcal{A}} q^*(s, a). \quad (1)$$

This assumption was also used for the linear MDP case in [9]. By applying the Bellman optimality equation, it can be shown that a policy  $\pi^*(s) = \arg \max_{a \in \mathcal{A}} q^*(s, a)$ , which deterministically selects actions that maximize  $q^*$  in the current state, is the optimal policy, with  $J^{\pi^*}(s) = J^*$ , for all  $s$  [9].

It was shown in ([32], Chapter 9), that for finite state setting Assumption 1 follows from the weakly communicating MDP assumption. Also, Assumption 1 holds under several other common conditions ([33], Section 3.3).

The learner's performance is measured by *regret*, which is defined as the loss in total reward compared to the optimal stationary policy for the total reward of the learner. Specifically, let  $\pi^* = \arg \max_{\pi} J^\pi$ .

175 The regret is defined as

$$\mathcal{R}(T) = \sum_{t=1}^T (J^* - r(s_t, a_t)). \quad (2)$$

176 We emphasize that under Assumption 1, for any initial state  $s_1 \in \mathcal{S}$ ,  $J^{\pi^*}(s_1) = J^*$ , that is reflected  
177 in our regret definition.

178 For any value function  $v : \mathcal{S} \rightarrow \mathbb{R}$ , throughout the paper, we use the notation

$$[Pv](z) = \mathbb{E}_{s' \sim P(\cdot|z)}[v(s')]$$

179 for the expected value function of the next state.

## 180 2.2 Kernel-Based Models And The RKHS

181 Consider a positive definite kernel  $k : \mathcal{Z} \times \mathcal{Z} \rightarrow \mathbb{R}$ . Let  $\mathcal{H}_k$  be the reproducing kernel Hilbert  
182 space (RKHS) induced by  $k$ , where  $\mathcal{H}_k$  contains a family of functions defined on  $\mathcal{Z}$ . Let  $\langle \cdot, \cdot \rangle_{\mathcal{H}_k} : \mathcal{H}_k \times \mathcal{H}_k \rightarrow \mathbb{R}$  and  $\|\cdot\|_{\mathcal{H}_k} : \mathcal{H}_k \rightarrow \mathbb{R}$  denote the inner product and the norm of  $\mathcal{H}_k$ , respectively.  
183 The reproducing property implies that for all  $f \in \mathcal{H}_k$ , and  $z \in \mathcal{Z}$ ,  $\langle f, k(\cdot, z) \rangle_{\mathcal{H}_k} = f(z)$ . Mercer  
184 theorem implies that  $k$  can be represented using a possibly infinite dimensional feature map:

$$k(z, z') = \sum_{m=1}^{\infty} \lambda_m \varphi_m(z) \varphi_m(z'), \quad (3)$$

186 where  $\lambda_m > 0$ , and  $\sqrt{\lambda_m} \varphi_m \in \mathcal{H}_k$  form an orthonormal basis of  $\mathcal{H}_k$ . In particular, any  $f \in \mathcal{H}_k$  can  
187 be represented using this basis and weights  $w_m \in \mathbb{R}$  as

$$f = \sum_{m=1}^{\infty} w_m \sqrt{\lambda_m} \varphi_m,$$

188 where  $\|f\|_{\mathcal{H}_k}^2 = \sum_{m=1}^{\infty} w_m^2$ . A formal statement and the details are provided in Appendix 8. We  
189 refer to  $\lambda_m$  and  $\varphi_m$  as (Mercer) eigenvalues and eigenfunctions of kernel  $k$ , respectively.

## 190 2.3 Kernel-Based Prediction

191 Kernel-based models provide powerful predictors and uncertainty estimators which can be leveraged  
192 to guide the RL algorithm. In particular, consider a fixed unknown function  $f \in \mathcal{H}_k$ . Assume a  $t \times 1$   
193 vector of noisy observations  $\mathbf{y}_t = [y_i = f(z_i) + \varepsilon_i]_{i=1}^t$  at observation points  $\{z_i\}_{i=1}^t$  is provided,  
194 where  $\varepsilon_i$  are independent zero mean noise terms. Kernel ridge regression provides the following  
195 predictor and uncertainty estimate, respectively [see, e.g., 34],

$$\begin{aligned} \hat{f}_t(z) &= \mathbf{k}_t^\top(z) (\mathbf{K}_t + \rho \mathbf{I})^{-1} \mathbf{y}_t, \\ \sigma_t^2(z) &= k(z, z) - \mathbf{k}_t^\top(z) (\mathbf{K}_t + \rho \mathbf{I})^{-1} \mathbf{k}_t(z), \end{aligned} \quad (4)$$

196 where  $\mathbf{k}_t(z) = [k(z, z_1), \dots, k(z, z_t)]^\top$  is a  $t \times 1$  vector of the kernel values between  $z$  and observa-  
197 tions,  $\mathbf{K}_t = [k(z_i, z_j)]_{i,j=1}^t$  is the  $t \times t$  kernel matrix,  $\mathbf{I}$  is the identity matrix appropriately sized to  
198 math  $\mathbf{K}_t$ , and  $\rho > 0$  is a free regularization parameter.

199 Confidence bounds of the form  $|f(z) - \hat{f}_t(z)| \leq \beta(\delta) \sigma_t(z)$  are established, for a confidence interval  
200 width multiplier  $\beta(\delta)$  at a confidence level  $1 - \delta$ , which depends on the assumptions on the setting  
201 and the noise. We will establish such confidence interval specific to the RL setting, in Theorem 1,  
202 and utilize it in our regret analysis.

## 203 2.4 Kernel-Based Modelling in RL

204 In our RL setting, we use a kernel-based model to predict the expected value function. In particular,  
205 for a given transition probability distribution  $P(s'|\cdot, \cdot)$  and a value function  $v : \mathcal{S} \rightarrow \mathbb{R}$ , we define  
206  $f = [Pv]$  and use past observations to form predictions and uncertainty estimates for  $f$ , as detailed  
207 in the following section. The value functions vary due to the Markovian nature of the temporal  
208 dynamics. To effectively use the confidence intervals established by the kernel-based models on  $f$ ,  
209 we require the following assumption.

210 **Assumption 2** We assume  $P(s'|\cdot, \cdot) \in \mathcal{H}_k$ , for some positive definite kernel  $k$ , and  $\|P(s'|\cdot, \cdot)\|_{\mathcal{H}_k} \leq$   
211 1 for all  $s' \in \mathcal{S}$ .

## 2.5 Eigendecay and Information Gain

Our regret bounds are presented in terms of maximum information gain which is a kernel-specific complexity term. Specifically, for a kernel  $k$  and a set of observation points  $\{z_i\}_{i=1}^t$ , we define the maximum information gain  $\gamma(t; \rho)$  as follows

$$\gamma(t; \rho) = \sup_{\{z_i\}_{i=1}^t \subset \mathcal{Z}} \frac{1}{2} \log \det \left( I + \frac{K_t}{\rho} \right),$$

where  $K_t$  is the kernel matrix defined in Section 2.3. Several works have established upper bounds on  $\gamma(t; \rho)$ . In the special case of a  $d$ -dimensional linear kernel, we have  $\gamma(t; \rho) = \mathcal{O}(d \log(t))$ . For kernels with exponential eigendecay, including SE,  $\gamma(t; \rho) = \mathcal{O}(\text{polylog}(t))$ . For kernels with polynomial eigendecay, which represent a crucial case due to challenges in establishing no-regret guarantees in RL and bandits, and include kernels of both practical and theoretical interest such as the Matérn family and NT kernels, we first provide the definition below and then the bound on  $\gamma$ .

**Definition 1** A kernel  $k$  is said to have a  $p$ -polynomial eigendecay if  $\forall m \geq 1$ ,  $\lambda_m \leq C m^{-p}$ , for some  $p > 1$ ,  $C > 0$  where  $\lambda_m$  are the Mercer eigenvalues of the kernel in decreasing order.

For kernels with  $p$ -polynomial eigendecay, we have [35, Corollary 1]:

$$\gamma(t; \rho) = \mathcal{O} \left( \left( \frac{t}{\rho} \right)^{\frac{1}{p}} \left( \log \left( 1 + \frac{t}{\rho} \right) \right)^{1 - \frac{1}{p}} \right).$$

## 3 KUCB-RL Algorithm

In this section, we introduce our main algorithm, Kernel-based Upper Confidence Bound in Reinforcement Learning (KUCB-RL). The algorithm's structure is similar to acquisition-based kernel bandit algorithms such as GP-UCB [22], where each action is chosen as the maximizer of an acquisition function. We construct an optimistic proxy  $q_t$  for the state-action value function. At each step  $t$ , given the current state  $s_t$ , the action  $a_t$  is selected as the maximizer of  $q_t(s_t, a)$  over  $a$ . This proxy  $q_t$  is derived using past observations of transitions, employing kernel ridge regression to provide a prediction and uncertainty estimate for the state-action value function over a future window of size  $w \in \mathbb{N}$ . The proxy is established as an upper confidence bound, following the principle of optimism in the face of uncertainty. The value functions are computed in batches of  $w$  steps, and the derived policies are unrolled over the subsequent  $w$  steps. The details are presented next.

We define a fixed window size,  $w \in \mathbb{N}$ , which represents the future interval that the algorithm will consider. For a given  $t_0$  where  $(t_0 \bmod w) = 0$ , including  $t_0 = 0$ , we initialize  $v_{t_0+w+1}(s) = 0, \forall s \in \mathcal{S}$ , reflecting the algorithm's consideration of the reward within this future window of size  $w$ . Subsequently, we recursively obtain proxies  $q_t$  and  $v_t$  for all steps  $t \in \{t : t_0 + 1 \leq t \leq t_0 + w\}$ . Let  $f_t$  denote  $[Pv_{t+1}]$ ,  $\hat{f}_t$  represent the kernel ridge predictor of  $[Pv_{t+1}]$ , and  $\sigma_t$  be its uncertainty estimator. The predictor and the uncertainty estimator are derived using the data set  $\mathcal{D}_{t_0}$ , which contains observations of past transitions up to  $t_0$ . We use the notation  $\mathcal{D}_t = \{(s_j, a_j, s_{j+1})\}_{j \leq t}$  for the past transitions, and also define  $\mathbf{v}_{t+1, t_0} = [v_{t+1}(s_2), v_{t+1}(s_3), \dots, v_{t+1}(s_{t_0+1})]^\top$ , for the values of the proxy value function at the history of state observations. We then have

$$\begin{aligned} \hat{f}_t(z) &= k_{t_0}^\top(z) (K_{t_0} + \rho I)^{-1} \mathbf{v}_{t+1, t_0}, \\ \sigma_t^2(z) &= k(z, z) - k_{t_0}^\top(z) (K_{t_0} + \rho I)^{-1} k_{t_0}(z), \end{aligned}$$

where  $k_t(z) = [k(z, z_1), k(z, z_2), \dots, k(z, z_t)]^\top$  denotes the vector of kernel values between  $z$  and  $(z_j = (s_j, a_j))_{j \leq t}$  in the history of observations, and  $K_t = [k(z_i, z_j)]_{i,j=1}^t$  denotes the kernel matrix.

Equipped with the kernel ridge predictor and uncertainty estimator, we define  $q_t$  as an upper confidence bound for  $f$ , as follows:

$$q_t = \Pi_{[0, w]} \left( r + \hat{f}_t + \beta(\delta) \sigma_t \right), \quad (5)$$

where  $1 - \delta$  represents a confidence level, and  $\beta(\delta)$  is a confidence interval width multiplier; the specific value of which is given in Theorem 2. The notation  $\Pi_{[a, b]}(\cdot)$  is used for projection on  $[a, b]$



---

**Algorithm 1** Kernel-based Upper Confidence Bound Reinforcement Learning (KUCB-RL)

---

**Require:** Regularization parameter  $\rho$ , window size  $w$ , confidence interval width multiplier  $\beta$ , confidence level  $1 - \delta$ ,  $\mathcal{S}, \mathcal{A}, r$ .

```
1: for  $t = 0, 1, 2, \dots$  do
2:   if  $(t \bmod w) = 0$  then
3:     Let  $v_{t+w+1} = \mathbf{0}$ ;
4:     for  $h = 1, 2, \dots, w$  do
5:       Compute  $q_{t+w+1-h}$  and  $v_{t+w+1-h}$  using equations (5) and (6).
6:     end for
7:   end if
8:   Select  $a_t = \arg \max_{a \in \mathcal{A}} q_t(s_t, a)$ ; Observe  $s_{t+1} \sim P(\cdot | s_t, a_t)$  and receive  $r(s_t, a_t)$ .
9: end for
```

---

interval. This step is natural since with the assumption  $r : \mathcal{Z} \rightarrow [0, 1]$  the value over a window of size  $w$  can not be more than  $w$ . We also define

$$v_t(s) = \max_{a \in \mathcal{A}} q_t(s, a), \quad \forall s \in \mathcal{S}. \quad (6)$$

By iteratively updating from  $t = t_0 + w$  to  $t = t_0 + 1$ , we compute the values of  $q_t$  and  $v_t$  for all  $t$  from  $t_0 + 1$  to  $t_0 + w$ . Then, we unroll the learned policy over the subsequent  $w$  steps, as the greedy policy with respect to  $q_t$ :

$$a_t = \arg \max_{a \in \mathcal{A}} q_t(s_t, a). \quad (7)$$

A pseudocode is provided in Algorithm 1.

## 4 Regret Bounds for KUCB-RL

In this section, we provide analytical results on the performance of KUCB-RL. We prove the first sublinear regret bounds in undiscounted RL setting under general assumptions based on kernel-based modelling. We first derive a novel confidence interval that is broadly applicable to the kernel-based RL problems. We then utilize this result to establish bounds on the regret of KUCB-RL.

### 4.1 Confidence Intervals for Kernel Based RL

The analysis of our algorithm utilizes confidence intervals of the form  $|f_t(z) - \hat{f}_t(z)| \leq \beta(\delta)\sigma_t(z)$ , where  $f_t = [Pv_t]$  denotes the expected value of a value function  $v_t$ , and  $\hat{f}_t$  and  $\sigma_t$  represent the kernel ridge predictor and the uncertainty estimate of  $f_t$ . Here,  $\beta(\delta)$  represents the width multiplier for the confidence interval at a  $1 - \delta$  confidence level. Similar confidence intervals are established in kernel ridge regression for a fixed function  $f$  in the RKHS of a specified kernel  $k$  [see, e.g., 36, 22, 23, 37, 24]. In the RL context, specific considerations are required as both  $f_t = [Pv_t]$  and the observation noise depend on the value function  $v_t$  that varies due to the Markovian nature of the temporal dynamics. We note that in this setting, for a given value function  $v : \mathcal{S} \rightarrow \mathbb{R}$ , the observation noise is captured by  $v(s_{t+1}) - [Pv](s_t, a_t)$ . A possible approach involves deriving confidence intervals that apply to a class  $\mathcal{V}$  of value functions. Such results appear in some of the existing work [26, 25]. The result most closely related to our is [26], which derives its confidence interval under the exact same kernel related assumptions as our work, but for the episodic MDP setting. With the same assumptions, the confidence interval that we establish is different from the one in [26]. In particular, their confidence interval is applicable to a specific value of kernel ridge regression parameter  $\rho$ , constrained by their proof techniques. Inspired by [24], which established a confidence interval for kernel ridge regression (not within the RL context) but allowed for a judicious selection of  $\rho$ , we prove a new confidence interval suitable for the RL setting that allows tuning parameter  $\rho$ . As a result, we obtain the first improved no-regret algorithms in this setting.

**Theorem 1 (Confidence Bound)** Consider  $v : \mathcal{S} \rightarrow \mathbb{R}$ , a conditional probability distribution  $P(s|z)$ ,  $s \in \mathcal{S}$ ,  $z \in \mathcal{Z}$ , and two positive definite kernels  $k : \mathcal{Z} \times \mathcal{Z} \rightarrow \mathbb{R}$  and  $k' : \mathcal{S} \times \mathcal{S} \rightarrow \mathbb{R}$ , where  $\mathcal{Z} = \mathcal{S} \times \mathcal{A}$  is compact subset of  $\mathbb{R}^d$ . Let  $f = [Pv]$  and assume  $\|v\|_{\mathcal{H}_{k'}} \leq C_v$ ,  $v(s) \leq w, \forall s \in \mathcal{S}$ , and  $\|f\|_{\mathcal{H}_k} \leq C_f$ , for some  $C_v, w, C_f > 0$ . A dataset  $\{(z_i, s'_i)\}_{i=1}^n \subset (\mathcal{Z} \times \mathcal{S})^n$  is provided such

that  $s'_i \sim P(\cdot|z^i)$ . Let  $\lambda_m$ ,  $m = 1, 2, \dots$  denote the Mercer's eigenvalues of  $k'$  in a decreasing order and  $\psi_m$  denote the corresponding eigenfunctions, with  $\psi_m \leq \psi_{\max}$  for some  $\psi_{\max} > 0$ .

Let  $\hat{f}_n$  and  $\sigma_n$  be the kernel ridge predictor and the uncertainty estimate of  $f$  using the observations:

$$\hat{f}_n(z) = k_n^\top(z)(\rho I + K_n)^{-1} \mathbf{v}_n, \quad \sigma_n^2(z) = k(z, z) - k_n^\top(z)(\rho I + K_n)^{-1} k_n(z),$$

where  $\mathbf{v}_n = [v(s'_1), v(s'_2), \dots, v(s'_n)]^\top$  is the vector of observations.

For all  $z \in \mathcal{Z}$  and  $v : \|v\|_{\mathcal{H}_{k'}} \leq C_v$ , the following holds, with probability at least  $1 - \delta$ ,

$$|f(z) - \hat{f}_n(z)| \leq \beta(\delta) \sigma_n(z),$$

with

$$\beta(\delta) = C_f + \frac{w}{\sqrt{\rho}} \left( 2 \log \left( \sqrt{\frac{M}{\delta}} \det(I + \rho^{-1} K_n) \right) \right)^{\frac{1}{2}} + \frac{2C_v \psi_{\max}}{\sqrt{\rho}} \left( n \sum_{m=M+1}^{\infty} \lambda_m \right)^{\frac{1}{2}}.$$

We can simplify the presentation of  $\beta$  under the following assumption.

**Assumption 3** For kernel  $k'$ , we assume  $M \sum_{m=M+1}^{\infty} \lambda_m = o(1)$  for any  $M \in \mathbb{N}$ .

This is a mild assumption. For example  $p$ -polynomial eigendecay profile with  $p > 1$ , that applies to a large class of common kernels including SE, Matérn and NT kernels satisfies this assumption.

**Remark 1** Under Assumption 3, the expression of  $\beta$  in Theorem 2 can be simplified as

$$\beta(\delta) = \mathcal{O} \left( C_f + \frac{w}{\sqrt{\rho}} \sqrt{\log\left(\frac{n}{\delta}\right) + \gamma(\rho; n)} \right).$$

Remark 1 can be observed by selecting  $M = n$  in the expression of  $\beta(\delta)$ , which provides a straightforward presentation of the confidence interval width multiplier. The proof of Theorem 1 involves the Mercer representation of  $v$  in terms of  $\psi_m$ . The expression of the prediction error  $|f(z) - \hat{f}_v(z)|$  is then decomposed into error terms corresponding to each  $\psi_m$ . We derive a high-probability error bound for the first  $M$  elements, which corresponds to the second term in the expression of  $\beta(\delta)$ , and bound the remaining  $m > M$  elements based on Mercer eigenvalues. This corresponds to the third term in the expression of  $\beta(\delta)$ . A detailed proof is provided in Appendix 6.

Theorem 1 is presented in a self-contained way, making it broadly applicable across various RL settings. In the following section, we apply this theorem within the analysis of the infinite horizon average reward setting to obtain a no-regret algorithm that is the first no-regret algorithm within this setting and under general kernel-related assumptions.

## 4.2 Regret Analysis of KUCB-RL

The weakest assumption regarding value functions is realizability, which suggests that the optimal value function  $v^*$  either belong to the an RKHS or are at least well-approximated by its elements. In the degenerate case of bandits with  $|S| = 1$ , realizability alone is sufficient for provably efficient algorithms [22, 23, 37]. However, for general MDPs, realizability is inadequate, necessitating stronger assumptions [10, 38, 26]. Building on these works, our main assumption involves a closure property for all value functions within the following class:

$$\mathcal{V} = \left\{ s \rightarrow \min \left\{ w, \max_{a \in \mathcal{A}} \left\{ r(s, a) + \phi^\top(s, a) \boldsymbol{\theta} + \beta \sqrt{\phi^\top(s, a) \Sigma^{-1} \phi(s, a)} \right\} \right\} \right\}, \quad (8)$$

where  $\beta \in \mathbb{R}$  and  $\beta > 0$ ,  $\|\boldsymbol{\theta}\| \leq \infty$ , and  $\Sigma$  is an  $\infty \times \infty$  matrix operator such that  $\Sigma \succeq \rho I$  for some  $\rho > 0$ , and  $\phi = [\phi_1, \phi_2, \dots]$ , where  $\phi_m = \sqrt{\lambda_m} \varphi_m$ , and  $\lambda_m$  and  $\varphi_m$  are the Mercer eigenvalues and eigenfunctions corresponding to a kernel  $k$  defined on  $\mathcal{Z} \times \mathcal{Z}$ . We assume  $\mathcal{V}$  is a subset of the RKHS of a kernel  $k'$  defined on  $\mathcal{S} \times \mathcal{S}$ .

**Assumption 4 (Optimistic Closure)** For any  $v \in \mathcal{V}$  and for some positive constant  $C_v$ , we have  $\|v\|_{k'} \leq C_v$ .



This technical assumption is the same as Assumption 1 in [26]. The optimistic closure assumption in the kernel-based setting is strictly weaker than the ones explored in the context of generalized linear function approximation [39].

**Theorem 2** Consider the undiscounted MDP setting described in Section 2. Run KUCB-RL given in Algorithm 1 for  $T$  steps. Under Assumptions 1, 2, 3, and 4, the regret of KUCB-RL, defined in Equation (2), satisfies, with probability at least  $1 - \delta$

$$\mathcal{R}(T) = \mathcal{O} \left( \frac{T}{w} + \left( w + \frac{w}{\sqrt{\rho}} \sqrt{\gamma(T; \rho) + \log \left( \frac{T}{\delta} \right)} \right) \sqrt{\rho T \gamma(T; \rho) + \rho^2 w^2 \gamma(T; \rho) \gamma(T/w; \rho)} \right).$$

The proof of Theorem 2 utilizes standard methods from the analysis of optimistic algorithms in RL and bandits, such as the elliptical potential lemma, leverages the confidence interval proven in Theorem 1, and also incorporates novel techniques. For example, Algorithm 1 updates the observation set every  $w$  steps, requiring us to characterize and bound the effect of this delay in the proof. A straightforward application of the elliptical potential lemma results in loose bounds that do not guarantee no-regret. We establish a tighter bound on this term, contributing to the improved regret bounds. The details are provided in Appendix 7.

We next instantiate our regret bounds for some special cases. In the linear case, with a choice of  $w = T^{\frac{1}{4}} d^{\frac{-1}{4}}$  and replacing the bound on  $\gamma(T; \rho)$ , we obtain  $\mathcal{R}(T) = \tilde{\mathcal{O}}(d^{\frac{1}{2}} T^{\frac{3}{4}})$ , recovering the existing results in their dependence on  $T$  and improving by a factor of  $d^{\frac{1}{4}}$ . For kernels with exponential eigendecay, with a choice of  $w = T^{\frac{1}{4}}$  and replacing the bound on  $\gamma(T; \rho)$ , we obtain  $\mathcal{R}(T) = \tilde{\mathcal{O}}(T^{\frac{3}{4}})$ . We formalize the result with  $p$ -polynomial kernels in the following remark as it may be of broader interest.

**Remark 2** Under the setting of Theorem 2, with a  $p$ -polynomial kernel, with the choice of parameters,  $w = T^{\frac{p-1}{4p+4}}$  and  $\rho = T^{\frac{1}{p+1}}$ , we obtain the following no-regret guarantee  $\mathcal{R}(T) = \tilde{\mathcal{O}}(T^{\frac{3p+5}{4p+4}})$ .

In the case of a Matérn kernel with smoothness parameter  $\nu$ , where  $p = 1 + \frac{2\nu}{d}$ , the regret bound translates to  $\mathcal{R}(T) = \mathcal{O} \left( T^{\frac{3\nu+4d}{4\nu+4d}} \right)$ .

## 5 Discussion and Limitations

We proposed KUCB-RL in the infinite horizon average reward setting and proved no-regret guarantees with general kernels, including those with polynomial eigendecay such as Matérn and NT kernels. To highlight the significance of our results, we note that in the case of episodic MDPs, the existing work of [12, 26] do not provide no-regret guarantees with general kernels. The work of [25] utilizes sophisticated domain partitioning techniques and relies on a specific assumption about the scaling of kernel eigenvalues with the size of the domain. We achieve improved rates on regret leveraging a confidence interval proven in Theorem 1, which is applicable across various RL problems. We next point out two main limitations of our work.

Regarding optimality, we can juxtapose our results with the  $\Omega(T^{\frac{\nu+d}{2\nu+d}})$  lower bounds proven in [40], for the degenerate case of bandits with Matérn kernel. Sophisticated algorithms, such as the *sup* variation of optimistic algorithms and those based on sample or domain partitioning [41, 31, 30], achieve this lower bound up to logarithmic factors in the case of bandits. However, a no-regret  $\tilde{\mathcal{O}}(T^{\frac{\nu+2d}{2\nu+2d}})$  guarantee, though suboptimal, for standard acquisition-based algorithms like GP-UCB has been provided only recently [24]. While we offer the first no-regret  $\tilde{\mathcal{O}}(T^{\frac{3\nu+4d}{4\nu+4d}})$  guarantee in the much more complex setting of RL, we cannot determine whether our results are improvable. This remains an area for future investigation.

Although RKHS elements of common kernels can approximate almost all continuous functions on compact subsets of  $\mathbb{R}^d$  [22], the optimistic closure assumption is somewhat limiting. A rigorous approach involves relaxing this assumption and finding an RKHS element that serves as an upper confidence bound on a function of interest  $f$  within the same RKHS. While this method appears to reasonably address the assumption, it is a technically involved problem that invites further contributions from researchers in the field.

## References

- [1] David Silver, Aja Huang, Chris J Maddison, Arthur Guez, Laurent Sifre, George Van Den Driessche, Julian Schrittwieser, Ioannis Antonoglou, Veda Panneershelvam, Marc Lanctot, et al. Mastering the game of Go with deep neural networks and tree search. *Nature*, 529(7587):484–489, 2016.
- [2] Kyowoon Lee, Sol-A Kim, Jaesik Choi, and Seong-Whan Lee. Deep reinforcement learning in continuous action spaces: a case study in the game of simulated curling. In *International Conference on Machine Learning*, pages 2937–2946. PMLR, 2018.
- [3] Oriol Vinyals, Igor Babuschkin, Wojciech M Czarnecki, Michaël Mathieu, Andrew Dudzik, Junyoung Chung, David H Choi, Richard Powell, Timo Ewalds, Petko Georgiev, et al. Grandmaster level in starcraft II using multi-agent reinforcement learning. *Nature*, 575(7782):350–354, 2019.
- [4] Gregory Kahn, Adam Villaflor, Vitchyr Pong, Pieter Abbeel, and Sergey Levine. Uncertainty-aware reinforcement learning for collision avoidance. *arXiv preprint arXiv:1702.01182*, 2017.
- [5] Azalia Mirhoseini, Anna Goldie, Mustafa Yazgan, Joe Wenjie Jiang, Ebrahim Songhori, Shen Wang, Young-Joon Lee, Eric Johnson, Omkar Pathak, Azade Nazi, et al. A graph placement methodology for fast chip design. *Nature*, 594(7862):207–212, 2021.
- [6] Dmitry Kalashnikov, Alex Irpan, Peter Pastor, Julian Ibarz, Alexander Herzog, Eric Jang, Deirdre Quillen, Ethan Holly, Mrinal Kalakrishnan, Vincent Vanhoucke, et al. Scalable deep reinforcement learning for vision-based robotic manipulation. In *Conference on Robot Learning*, pages 651–673. PMLR, 2018.
- [7] Alhussein Fawzi, Matej Balog, Aja Huang, Thomas Hubert, Bernardino Romera-Paredes, Mohammadamin Barekatain, Alexander Novikov, Francisco J R Ruiz, Julian Schrittwieser, Grzegorz Swirszcz, et al. Discovering faster matrix multiplication algorithms with reinforcement learning. *Nature*, 610(7930):47–53, 2022.
- [8] Chen-Yu Wei, Mehdi Jafarnia Jahromi, Haipeng Luo, Hiteshi Sharma, and Rahul Jain. Model-free reinforcement learning in infinite-horizon average-reward markov decision processes. In *International conference on machine learning*, pages 10170–10180. PMLR, 2020.
- [9] Chen-Yu Wei, Mehdi Jafarnia Jahromi, Haipeng Luo, and Rahul Jain. Learning infinite-horizon average-reward mdps with linear function approximation. In *International Conference on Artificial Intelligence and Statistics*, pages 3007–3015. PMLR, 2021.
- [10] Chi Jin, Zhuoran Yang, Zhaoran Wang, and Michael I Jordan. Provably efficient reinforcement learning with linear function approximation. In *Conference on Learning Theory*, pages 2137–2143. PMLR, 2020.
- [11] Dongruo Zhou, Jiafan He, and Quanquan Gu. Provably efficient reinforcement learning for discounted mdps with feature mapping. In *International Conference on Machine Learning*, pages 12793–12802. PMLR, 2021.
- [12] Zhuoran Yang, Chi Jin, Zhaoran Wang, Mengdi Wang, and Michael Jordan. Provably efficient reinforcement learning with kernel and neural function approximations. *Advances in Neural Information Processing Systems*, 33:13903–13916, 2020.
- [13] Arthur Jacot, Franck Gabriel, and Clément Hongler. Neural tangent kernel: Convergence and generalization in neural networks. *Advances in neural information processing systems*, 31, 2018.
- [14] Peter Auer, Thomas Jaksch, and Ronald Ortner. Near-optimal regret bounds for reinforcement learning. *Advances in neural information processing systems*, 21, 2008.
- [15] Zihan Zhang and Qiaomin Xie. Sharper model-free reinforcement learning for average-reward markov decision processes. In *The Thirty Sixth Annual Conference on Learning Theory*, pages 5476–5477. PMLR, 2023.

- [16] Junyu Zhang, Alec Koppel, Amrit Singh Bedi, Csaba Szepesvari, and Mengdi Wang. Variational policy gradient method for reinforcement learning with general utilities. *Advances in Neural Information Processing Systems*, 33:4572–4583, 2020.
- [17] Peter Bartlett and Ambuj Tewari. Regal: a regularization based algorithm for reinforcement learning in weakly communicating mdps. In *Uncertainty in Artificial Intelligence: Proceedings of the 25th Conference*, pages 35–42. AUAI Press, 2009.
- [18] Yasin Abbasi-Yadkori, Peter Bartlett, Kush Bhatia, Nevena Lazic, Csaba Szepesvari, and Gellért Weisz. Politex: Regret bounds for policy iteration using expert prediction. In *International Conference on Machine Learning*, pages 3692–3702. PMLR, 2019.
- [19] Yasin Abbasi-Yadkori, Nevena Lazic, Csaba Szepesvari, and Gellert Weisz. Exploration-enhanced politex. *arXiv preprint arXiv:1908.10479*, 2019.
- [20] Botao Hao, Nevena Lazic, Yasin Abbasi-Yadkori, Pooria Joulani, and Csaba Szepesvári. Adaptive approximate policy iteration. In *International Conference on Artificial Intelligence and Statistics*, pages 523–531. PMLR, 2021.
- [21] Joongkyu Lee and Min-hwan Oh. Demystifying linear mdps and novel dynamics aggregation framework. In *The Twelfth International Conference on Learning Representations*, 2023.
- [22] Niranjan Srinivas, Andreas Krause, Sham Kakade, and Matthias Seeger. Gaussian process optimization in the bandit setting: No regret and experimental design. In *ICML 2010 - Proceedings, 27th International Conference on Machine Learning*, pages 1015–1022, July 2010.
- [23] Sayak Ray Chowdhury and Aditya Gopalan. On kernelized multi-armed bandits. In *International Conference on Machine Learning*, pages 844–853. PMLR, 2017.
- [24] Justin Whitehouse, Aaditya Ramdas, and Steven Z Wu. On the sublinear regret of gp-ucb. *Advances in Neural Information Processing Systems*, 36, 2024.
- [25] Sattar Vakili and Julia Olkhovskaya. Kernelized reinforcement learning with order optimal regret bounds. *Advances in Neural Information Processing Systems*, 36, 2023.
- [26] Sayak Ray Chowdhury and Rafael Oliveira. Value function approximations via kernel embeddings for no-regret reinforcement learning. In *Asian Conference on Machine Learning*, pages 249–264. PMLR, 2023.
- [27] Omar Darwiche Domingues, Pierre Ménard, Matteo Pirota, Emilie Kaufmann, and Michal Valko. A kernel-based approach to non-stationary reinforcement learning in metric spaces. In *International Conference on Artificial Intelligence and Statistics*, pages 3538–3546. PMLR, 2021.
- [28] Peter L Bartlett and Ambuj Tewari. Regal: A regularization based algorithm for reinforcement learning in weakly communicating mdps. *arXiv preprint arXiv:1205.2661*, 2012.
- [29] Yue Wu, Dongruo Zhou, and Quanquan Gu. Nearly minimax optimal regret for learning infinite-horizon average-reward mdps with linear function approximation. In *International Conference on Artificial Intelligence and Statistics*, pages 3883–3913. PMLR, 2022.
- [30] Zihan Li and Jonathan Scarlett. Gaussian process bandit optimization with few batches. In *International Conference on Artificial Intelligence and Statistics*, 2022.
- [31] Sudeep Salgia, Sattar Vakili, and Qing Zhao. A domain-shrinking based Bayesian optimization algorithm with order-optimal regret performance. *Conference on Neural Information Processing Systems*, 34, 2021.
- [32] Martin L Puterman. Markov decision processes. *Handbooks in operations research and management science*, 2:331–434, 1990.
- [33] Onésimo Hernández-Lerma. *Adaptive Markov control processes*, volume 79. Springer Science & Business Media, 2012.

- 460 [34] Bernhard Schölkopf, Alexander J Smola, Francis Bach, et al. *Learning with kernels: support*  
461 *vector machines, regularization, optimization, and beyond*. MIT press, 2002.
- 462 [35] Sattar Vakili, Kia Khezeli, and Victor Picheny. On information gain and regret bounds in  
463 gaussian process bandits. In *International Conference on Artificial Intelligence and Statistics*,  
464 pages 82–90. PMLR, 2021.
- 465 [36] Yasin Abbasi-Yadkori. Online learning for linearly parametrized control problems. 2013.
- 466 [37] Sattar Vakili, Nacime Bouziani, Sepehr Jalali, Alberto Bernacchia, and Da-shan Shiu. Optimal  
467 order simple regret for gaussian process bandits. *Advances in Neural Information Processing*  
468 *Systems*, 34:21202–21215, 2021.
- 469 [38] Yining Wang, Ruosong Wang, Simon S Du, and Akshay Krishnamurthy. Optimism in reinforce-  
470 ment learning with generalized linear function approximation. *arXiv preprint arXiv:1912.04136*,  
471 2019.
- 472 [39] Yining Wang, Ruosong Wang, Simon Shaolei Du, and Akshay Krishnamurthy. Optimism  
473 in reinforcement learning with generalized linear function approximation. In *International*  
474 *Conference on Learning Representations*, 2020.
- 475 [40] Jonathan Scarlett, Ilija Bogunovic, and Volkan Cevher. Lower bounds on regret for noisy  
476 gaussian process bandit optimization. In *Conference on Learning Theory*, pages 1723–1742.  
477 PMLR, 2017.
- 478 [41] Michal Valko, Nathaniel Korda, Rémi Munos, Ilias Flaounas, and Nelo Cristianini. Finite-time  
479 analysis of kernelised contextual bandits. *arXiv preprint arXiv:1309.6869*, 2013.
- 480 [42] Sing-Yuan Yeh, Fu-Chieh Chang, Chang-Wei Yueh, Pei-Yuan Wu, Alberto Bernacchia, and  
481 Sattar Vakili. Sample complexity of kernel-based q-learning. In *International Conference on*  
482 *Artificial Intelligence and Statistics*, pages 453–469. PMLR, 2023.
- 483 [43] STEVEN P Lalley. Concentration inequalities. *Lecture notes, University of Chicago*, 2013.
- 484 [44] Yasin Abbasi-Yadkori, Dávid Pál, and Csaba Szepesvári. Improved algorithms for linear  
485 stochastic bandits. *Advances in neural information processing systems*, 24, 2011.
- 486 [45] Daniele Calandriello, Luigi Carratino, Alessandro Lazaric, Michal Valko, and Lorenzo Rosasco.  
487 Scaling gaussian process optimization by evaluating a few unique candidates multiple times. In  
488 *International Conference on Machine Learning*, pages 2523–2541. PMLR, 2022.
- 489 [46] J. Mercer. Functions of positive and negative type, and their connection with the theory  
490 of integral equations. *Philosophical Transactions of the Royal Society of London. Series A,*  
491 *Containing Papers of a Mathematical or Physical Character*, 209:415–446, 1909.
- 492 [47] Andreas Christmann and Ingo Steinwart. *Support Vector Machines*. Springer New York, NY,  
493 2008.

## 6 Proof of Theorem 1

In this section, we prove the confidence bound. Let us use the notation

$$\alpha_n(z) = k_n^\top(z)(\rho I + K_n)^{-1}, \quad (9)$$

and  $\varepsilon_i = v(s'_i) - f(z_i)$ ,  $\varepsilon_n = [\varepsilon_1, \varepsilon_2, \dots, \varepsilon_n]^\top$ ,  $\mathbf{f}_n = [f(z_1), f(z_2), \dots, f(z_n)]^\top$ .

This allows us to rewrite the prediction error as

$$\begin{aligned} f(z) - \hat{f}_n(z) &= f(z) - \alpha_n^\top(z) \mathbf{v}_n \\ &= f(z) - \alpha_n^\top(z) (\mathbf{f}_n + \varepsilon_n) \\ &= (f(z) - \alpha_n^\top(z) \mathbf{f}_n) - \alpha_n^\top(z) \varepsilon_n. \end{aligned} \quad (10)$$

The first term on the right-hand side represents the prediction error from noise-free observations, and the second term is the prediction error due to noise. The first term is deterministic (not random) and can be bounded following the standard approaches in kernel-based models, for example using the following result from [37]:

**Lemma 1 (Proposition 1 in [37])** *We have*

$$\sigma_n^2(z) = \sup_{f: \|f\|_{\mathcal{H}} \leq 1} (f(z) - \alpha_n^\top(z) \mathbf{f}_n)^2 + \rho \|\alpha_n(z)\|_{\ell^2}^2.$$

Based on this lemma, the first term on the right hand side of (10) can be deterministically bounded by  $C_f \sigma_n(z)$ :

$$|f(z) - \alpha_n^\top(z) \mathbf{f}_n| \leq C_f \sigma_n(z).$$

The challenging part in Equation (10) is the second term, which is the noise-dependent term  $\alpha_n^\top(z) \varepsilon_n$ . Next, we provide a high probability bound on this term.

We leverage the Mercer representation of  $v$  and write:

$$v(s) = \sum_{m=1}^{\infty} w_m \lambda_m^{\frac{1}{2}} \psi_m(s).$$

We rewrite the observation vector  $\mathbf{v}_n$  as the sum of a noise term and the noise-free part  $\mathbf{f}$ :

$$v(s'_i) = \underbrace{(v(s'_i) - f(z_i))}_{\text{Observation noise}} + \underbrace{f(z_i)}_{\text{Noise-free observation}}$$

Using the notation  $\bar{\psi}_m(z) = \mathbb{E}_{s' \sim P(\cdot|z)} \psi(s')$ , we can rewrite  $f(z_i)$  as follows:

$$\begin{aligned} f(z_i) &= \mathbb{E}_{s \sim P(\cdot|z'_i)} [v(s)] \\ &= \mathbb{E}_{s \sim P(\cdot|z_i)} \left[ \sum_{m=1}^{\infty} w_m \lambda_m^{\frac{1}{2}} \psi_m(s) \right] \\ &= \sum_{m=1}^{\infty} w_m \lambda_m^{\frac{1}{2}} \mathbb{E}_{s \sim P(\cdot|z_i)} [\psi_m(s)] \\ &= \sum_{m=1}^{\infty} w_m \lambda_m^{\frac{1}{2}} \bar{\psi}_m(z_i). \end{aligned} \quad (11)$$

Using this representation, we can rewrite the second term of (10) as follows

$$\begin{aligned} \sum_{i=1}^n \alpha_i(z) \varepsilon_i &= \sum_{i=1}^n \alpha_i(z) \left( \sum_{m=1}^{\infty} w_m \lambda_m \psi_m(s'_i) - \sum_{m=1}^{\infty} w_m \lambda_m \bar{\psi}_m(z_i) \right) \\ &= \sum_{m=1}^{\infty} w_m \lambda_m \sum_{i=1}^n \alpha_i(z) (\psi_m(s'_i) - \bar{\psi}_m(z_i)) \\ &= \sum_{m=1}^M w_m \lambda_m \sum_{i=1}^n \alpha_i(z) (\psi_m(s'_i) - \bar{\psi}_m(z_i)) + \sum_{m=M+1}^{\infty} w_m \lambda_m \sum_{i=1}^n \alpha_i(z) (\psi_m(s'_i) - \bar{\psi}_m(z_i)). \end{aligned}$$

511 We decomposed the noise-related error term into an infinite series corresponding to each eigenfunction  
 512  $\psi_m$ ,  $m = 1, 2, \dots$ , and partitioned that into the first  $M$  elements and the rest. We now can use  
 513 Corollary 1 in [24] that is a confidence interval for kernel ridge regression. In particular, with  
 514 probability at least  $1 - \delta/M$ , we have

$$\sum_{i=1}^n \alpha_i(z) (\psi_m(s'_i) - \bar{\psi}_m(z_i)) \leq \frac{\psi_{\max} \sigma_n(z)}{\sqrt{\rho}} \left( 2 \log \left( \sqrt{\frac{M}{\delta} \det(I + \rho^{-1} K_n)} \right) \right)^{\frac{1}{2}}.$$

515 Summing up over the first  $M$  elements, and using a probability union bound, with probability at least  
 516  $1 - \delta$ , we have

$$\begin{aligned} \sum_{m=1}^M w_m \lambda_m \sum_{i=1}^n \zeta_i(z) (\psi_m(s'_i) - \bar{\psi}_m(z_i)) &\leq \sum_{m=1}^M w_m \lambda_m \frac{\psi_{\max} \sigma_n(z)}{\sqrt{\rho}} \left( 2 \log \left( \sqrt{\frac{M}{\delta} \det(I + \rho^{-1} K_n)} \right) \right)^{\frac{1}{2}} \\ &\leq \frac{w \sigma_n(z)}{\sqrt{\rho}} \left( 2 \log \left( \sqrt{\frac{M}{\delta} \det(I + \rho^{-1} K_n)} \right) \right)^{\frac{1}{2}}. \end{aligned}$$

517 For the rest of the elements  $m > M$ , we have

$$\begin{aligned} \sum_{m=M+1}^{\infty} w_m \lambda_m^{\frac{1}{2}} \sum_{i=1}^n \alpha_i(z) (\psi_m(s'_i) - \bar{\psi}_m(z_i)) &\leq 2\psi_{\max} \sum_{m=M+1}^{\infty} w_m \lambda_m^{\frac{1}{2}} \sum_{i=1}^n \alpha_i(z) \\ &\leq 2\psi_{\max} \sum_{m=M+1}^{\infty} w_m \lambda_m^{\frac{1}{2}} \left( n \sum_{i=1}^n \alpha_i^2(z) \right)^{\frac{1}{2}} \\ &\leq \frac{2\sigma_n(z) \psi_{\max} \sqrt{n}}{\sqrt{\rho}} \sum_{m=M+1}^{\infty} w_m \lambda_m^{\frac{1}{2}} \\ &\leq \frac{2\sigma_n(z) \psi_{\max} \sqrt{n}}{\sqrt{\rho}} \left( \left( \sum_{m=M+1}^{\infty} w_m^2 \right) \left( \sum_{m=M+1}^{\infty} \lambda_m \right) \right)^{\frac{1}{2}} \\ &\leq \frac{2C_v \sigma_n(z) \psi_{\max}}{\sqrt{\rho}} \left( n \sum_{m=M+1}^{\infty} \lambda_m \right)^{\frac{1}{2}}. \end{aligned}$$

518 The first inequality holds by definition of  $\psi_{\max}$ . The second inequality is based on the Cauchy-  
 519 Schwarz inequality. The third inequality uses Lemma 1. The fourth inequality utilizes the Cauchy-  
 520 Schwarz inequality again, and the last inequality results from the upper bound on the RKHS norm  
 521 of  $v$ .

522 Putting all the terms together, with probability  $1 - \delta$ ,

$$\begin{aligned} |f(z) - \hat{f}_n(z)| &\leq \\ &\left( C_f + \frac{w}{\sqrt{\rho}} \left( 2 \log \left( \sqrt{\frac{M}{\delta} \det(I + \rho^{-1} K_n)} \right) \right)^{\frac{1}{2}} + \frac{2C_v \psi_{\max}}{\sqrt{\rho}} \left( n \sum_{m=M+1}^{\infty} \lambda_m \right)^{\frac{1}{2}} \right) \sigma_n(z), \end{aligned}$$

523 that completes the proof.

## 524 7 Proof of Theorem 2

525 To analyze the performance of KUCB-RL, we first define an event  $\mathcal{E}$  that all the confidence intervals  
 526 used in the algorithm hold true.

$$\mathcal{E} = \left\{ |f_t(z) - \hat{f}_t(z)| \leq \beta(\delta) \sigma_t(z), \quad \forall t \in [T] \right\}, \quad (12)$$



527 where

$$\beta(\delta) = \mathcal{O} \left( w + \frac{w}{\sqrt{\rho}} \sqrt{\log\left(\frac{n}{\delta}\right) + \gamma(\rho; T)} \right).$$

528 By Theorem 1, we have  $\Pr[\mathcal{E}] \geq 1 - \delta/2$ . We note the under Assumption 4,  $\|v\| \leq C_v$ .

529 For a bounded function  $v : \mathcal{S} \rightarrow \mathbb{R}$ , we define its span as  $\text{span}(v) = \sup_{s, s' \in \mathcal{S}} |v(s) - v(s')|$ .

530 Under Assumption 2, we have  $\|Pv\|_{\mathcal{H}_k} = \mathcal{O}(\text{span}(v))$ . See [42], Lemma 3. Since  $v_t$  is upper  
531 bounded by  $w$  by construction, we have  $\|Pv_t\| = \mathcal{O}(w)$  that replaces  $C_f$  in Theorem 1.

532 We condition the rest of the proof on event  $\mathcal{E}$ .

533 Consider  $t_0$  such that  $(t_0 \bmod w) = 0$  we bound the regret over window  $t \in [t_0 + 1, t_0 + w]$ ,  
534 denoted by  $\mathcal{R}_{t_0}(w)$ . In addition let  $V_w^*(s)$  denote the optimum achievable total reward over a window  
535 of size  $w$  starting with initial state  $s$ , and  $V_w^\pi(s)$  denote the total reward over a window of size  $w$   
536 achieved by KUCB-RL starting with initial state  $s$ .

$$\mathcal{R}_{t_0}(w) = wJ^* - \sum_{t=t_0+1}^{t_0+w} r(s_t, a_t) = wJ^* - V_w^*(s_{t_0+1}) + V_w^*(s_{t_0+1}) - \sum_{t=t_0+1}^{t_0+w} r(s_t, a_t).$$

537 The first term is bounded by the span of  $v^*$ .

538 **Lemma 2** For any  $s$ ,  $|wJ^* - V_w^*(s)| \leq \text{span}(v^*)$ .

539 Proof follows the exact same lines as in the proof of Lemma 13 in [9].

540 We next bound the second term in  $\mathcal{R}_{t_0}(w)$ . We first prove that  $V_w^*(s) \leq v_{t_0}(s)$ .

541 **Lemma 3** Under event  $\mathcal{E}$ , we have  $V_w^*(s) \leq v_{t_0}(s)$ ,  $\forall s \in \mathcal{S}$ .

542 **Proof 1 (Proof of Lemma 3)** We can prove this by induction. Note that  $V_0^*(s) = v_{t_0+w+1}(s) = 0$ .

543 For any  $j \in [w]$ , we have

$$\begin{aligned} V_j^*(s) - v_{t_0+w+1-j}(s) &= \max_{a \in \mathcal{A}} Q_j^*(s, a) - \max_{a \in \mathcal{A}} q_{t_0+w+1-j}(s, a) \\ &\leq \max_{a \in \mathcal{A}} \{Q_j^*(s, a) - q_{t_0+w+1-j}(s, a)\} \\ &= \max_{a \in \mathcal{A}} \{[PV_{j+1}^*](s, a) - [Pv_{t_0+w-j}](s, a)\} \\ &= \max_{a \in \mathcal{A}} \{\mathbb{E}_{s' \sim P(\cdot|s, a)} [V_{j+1}^*(s') - v_{t_0+w-j}(s')]\} \\ &\leq 0. \end{aligned}$$

544 The first inequality is due to rearrangement of max, and the second inequality is by the induction  
545 assumption. We thus have  $V_w^*(s) \leq v_{t_0}(s)$ .

546 We now bound the difference between  $v_{t_0}(s_{t_0+1})$  and sum of the reward over the window starting at  
547 step  $t_0 + 1$ :  $v_{t_0+1}(s_{t_0+1}) - V_w^\pi(s_{t_0+1})$ . We note that  $v_{t_0+w}(s_{t_0+w}) = V_0^\pi(s_{t_0+w}) = 0$  and

$$\begin{aligned} v_{t_0+j}(s_{t_0+j}) - V_{w-j}^\pi(s_{t_0+j}) &= q_{t_0+j}(s_{t_0+j}, a_{t_0+j}) - Q_{w-j}^\pi(s_{t_0+j}, a_{t_0+j}) \\ &\leq [Pv_{t_0+j+1}](s_{t_0+j}, a_{t_0+j}) - [PV_{w-j}^\pi](s_{t_0+j}, a_{t_0+j}) + 2\beta(\delta)\sigma_{t_0}(s_{t_0+j}, a_{t_0+j}) \\ &= v_{t_0+j+1}(s_{t_0+j+1}) - V_{w-j-1}^\pi(s_{t_0+j+1}) + 2\beta(\delta)\sigma_{t_0}(s_{t_0+j}, a_{t_0+j}) \\ &\quad + ([Pv_{t_0+j+1}](s_{t_0+j}, a_{t_0+j}) - v_{t_0+j+1}(s_{t_0+j+1})) \\ &\quad + (V_{w-j-1}^\pi(s_{t_0+j+1}) - [PV_{w-j}^\pi](s_{t_0+j}, a_{t_0+j})). \end{aligned}$$

548 The inequality holds under event  $\mathcal{E}$ . We obtained a recursive relationship for  $v_{t_0+j}(s_{t_0+j}) -$   
549  $V_{w-j}^\pi(s_{t_0+j})$ . Iterating over  $j = w$  to  $j = 1$ , we get

$$\begin{aligned}
v_{t_0+1}(s_{t_0+1}) - V_w^\pi(s_{t_0+1}) &\leq \sum_{t=t_0+1}^{t_0+w} 2\beta(\delta)\sigma_{t_0}(s_t, a_t) + \sum_{t=t_0+1}^{t_0+w} ([Pv_{t+1}](s_t, a_t) - v_{t+1}(s_{t+1})) \\
&\quad + \sum_{t=t_0+1}^{t_0+w} (V_{w+t_0-t-1}^\pi(s_{t+1}) - [PV_{w+t_0-t}^\pi](s_t, a_t)).
\end{aligned}$$

550 The second and third terms are zero mean martingales with a span of  $2w$ , which are Gaussian random  
551 variables with parameter  $w$ . Therefore, by Azuma-Hoeffding inequality [43], with probability at least  
552  $1 - \delta/2$ ,

$$\begin{aligned}
&\sum_{t=1}^T ([Pv_{t+1}](s_t, a_t) - v_{t+1}(s_{t+1})) + \sum_{t=1}^T (V_{w+\lfloor t/w \rfloor - t - 1}^\pi(s_{t+1}) - [PV_{w+\lfloor t/w \rfloor - t}^\pi](s_t, a_t)) \\
&\leq w \sqrt{2T \log \left( \frac{2}{\delta} \right)}.
\end{aligned}$$

553 We note that for each  $t \in [T]$ , we can present the corresponding  $t_0$  with  $t_0 = \lfloor t/w \rfloor$ . Summing up  
554 the regret over all windows of size  $w$  up to time  $t$ , we have, with probability  $1 - \delta$ ,

$$\mathcal{R}(T) \leq \frac{T \text{span}(v^*)}{w} + w \sqrt{2T \log \left( \frac{2}{\delta} \right)} + \sum_{t=1}^T \sigma_{\lfloor t/w \rfloor}(z_t). \quad (13)$$

555 It thus remains to bound  $\sum_{t=1}^T \sigma_{\lfloor t/w \rfloor}(z_t)$ .

556 The sum of sequential standard deviations of a kernel based model is often bounded using the  
557 following result from [22] that is similar to the elliptical potential lemma in linear bandits [44].

$$\sum_{t=1}^T \sigma_{t-1}^2(z_t) \leq \frac{2\gamma(T; \rho)}{\log(1 + 1/\rho)}. \quad (14)$$

558 This result however is not directly applicable here due to the  $\lfloor t/w \rfloor$  subscript in  $\sigma_{\lfloor t/w \rfloor}$  rather  $\sigma_{t-1}$ .  
559 A loose approach would be to partition the sequence into  $w$  sequences, each for one  $j \in [w]$  of the  
560 form  $\sigma_{wi+j}$ ,  $i = 1, 2, \dots, T/w$ . For each of those sequences, (14) is applicable and we get

$$\sum_{i=1}^{T/w} \sigma_{w(i-1)+j}^2(z_{wi+j}) \leq \frac{2\gamma(T/w; \rho)}{\log(1 + 1/\rho)}. \quad (15)$$

561 Using this bound we have

$$\begin{aligned}
\sum_{t=1}^T \sigma_{\lfloor t/w \rfloor}^2(z_t) &= \sum_{j=1}^w \sum_{i=1}^{T/w} \sigma_{w(i-1)+j}^2(z_{wi+j}) \\
&\leq \frac{2w\gamma(T/w; \rho)}{\log(1 + 1/\rho)}.
\end{aligned} \quad (16)$$

562 We use this loose bound and the following lemma to obtain a tight bound on the sum of standard  
563 deviations.

564 **Lemma 4 (Proposition A.1 in [45])** *For any sequence of points  $\{z_j\}_{j=1}^T$ , for any  $z$  and  $t' < t$*

$$1 \leq \frac{\sigma_{t'}^2(z)}{\sigma_t^2(z)} \leq 1 + \sum_{j=t'+1}^t \sigma_{t'}^2(z_j).$$

565 We thus can write

$$\begin{aligned}
\sum_{t=1}^T \sigma_{\lfloor t/w \rfloor}(s_t, a_t) &\leq \sum_{t=1}^T \sigma_t(s_t, a_t) \sqrt{1 + \sum_{j=\lfloor t/w \rfloor+1}^t \sigma_{\lfloor t/w \rfloor}^2(s_j, a_j)} \\
&\leq \sqrt{\sum_{t=1}^T \sigma_t^2(s_t, a_t)} \sqrt{T + w \sum_{t=1}^T \sigma_{\lfloor t/w \rfloor}^2(s_t, a_t)} \\
&\leq \sqrt{\frac{2\gamma(T; \rho)}{\log(1 + 1/\rho)}} \left( T + \frac{2w^2\gamma(T/w; \rho)}{\log(1 + 1/\rho)} \right) \tag{17}
\end{aligned}$$

566 The first inequality is by Lemma 4. The second inequality is by Cauchy-Schwarz inequality.

567 Replacing this bound on standard deviations in (13), we get

$$\mathcal{R}(T) = \mathcal{O} \left( \frac{T}{w} + \left( w + \frac{w}{\sqrt{\rho}} \sqrt{\gamma(T; \rho) + \log \left( \frac{n}{\delta} \right)} \right) \sqrt{\rho T \gamma(T; \rho) + \rho^2 w^2 \gamma(T; \rho) \gamma(T/w; \rho)} \right). \tag{18}$$

568 The proof of the regret bound is complete.

## 569 8 Mercer Theorem and the RKHSs

570 Mercer theorem [46] provides a representation of the kernel in terms of an infinite dimensional  
571 feature map [e.g., see, 47, Theorem 4.49]. Let  $\mathcal{Z}$  be a compact metric space and  $\mu$  be a finite Borel  
572 measure on  $\mathcal{Z}$  (we consider Lebesgue measure in a Euclidean space). Let  $L_\mu^2(\mathcal{Z})$  be the set of  
573 square-integrable functions on  $\mathcal{Z}$  with respect to  $\mu$ . We further say a kernel is square-integrable if

$$\int_{\mathcal{Z}} \int_{\mathcal{Z}} k^2(z, z') d\mu(z) d\mu(z') < \infty.$$

574 **Theorem 3 (Mercer Theorem)** *Let  $\mathcal{Z}$  be a compact metric space and  $\mu$  be a finite Borel measure*  
575 *on  $\mathcal{Z}$ . Let  $k$  be a continuous and square-integrable kernel, inducing an integral operator  $T_k$  :*  
576  *$L_\mu^2(\mathcal{Z}) \rightarrow L_\mu^2(\mathcal{Z})$  defined by*

$$(T_k f)(\cdot) = \int_{\mathcal{Z}} k(\cdot, z') f(z') d\mu(z'),$$

577 *where  $f \in L_\mu^2(\mathcal{Z})$ . Then, there exists a sequence of eigenvalue-eigenfeature pairs  $\{(\lambda_m, \varphi_m)\}_{m=1}^\infty$*   
578 *such that  $\lambda_m > 0$ , and  $T_k \varphi_m = \lambda_m \varphi_m$ , for  $m \geq 1$ . Moreover, the kernel function can be represented*  
579 *as*

$$k(z, z') = \sum_{m=1}^\infty \lambda_m \varphi_m(z) \varphi_m(z'),$$

580 *where the convergence of the series holds uniformly on  $\mathcal{Z} \times \mathcal{Z}$ .*

581 According to the Mercer representation theorem [e.g., see, 47, Theorem 4.51], the RKHS induced  
582 by  $k$  can consequently be represented in terms of  $\{(\lambda_m, \varphi_m)\}_{m=1}^\infty$ .

583 **Theorem 4 (Mercer Representation Theorem)** *Let  $\{(\lambda_m, \varphi_m)\}_{i=1}^\infty$  be the Mercer eigenvalue*  
584 *eigenfeature pairs. Then, the RKHS of  $k$  is given by*

$$\mathcal{H}_k = \left\{ f(\cdot) = \sum_{m=1}^\infty w_m \lambda_m^{\frac{1}{2}} \varphi_m(\cdot) : w_m \in \mathbb{R}, \|f\|_{\mathcal{H}_k}^2 := \sum_{m=1}^\infty w_m^2 < \infty \right\}.$$

585 Mercer representation theorem indicates that the scaled eigenfeatures  $\{\sqrt{\lambda_m} \varphi_m\}_{m=1}^\infty$  form an  
586 orthonormal basis for  $\mathcal{H}_k$ .
